# Supplementary material for: Cortical fast-spiking parvalbumin interneurons enwrapped in the perineuronal net express the metallopeptidases Adamts8, Adamts15 and Neprilysin
Source: PubMed Central journal article supplement — Mol Psychiatry. 2014 Dec 16;20(2):154–61. doi: 10.1038/mp.2014.162 (PMC4356748; doi:10.1038/mp.2014.162), 2014-12-16
Supplement: mp2014162x1.pdf [file mp2014162x1.pdf]

# Supplementary Table 1

Sequence of primers and nested primers

| Number    | Gene     | NCBI, Allen Mouse Brain Atlas, Gensat References                                                                                                        | DNA Sequence (5'→3')      | Primer size (nt) | Tm | %GC | PCR product size (bp) |
|-----------|----------|---------------------------------------------------------------------------------------------------------------------------------------------------------|---------------------------|------------------|----|-----|-----------------------|
| <b>1</b>  | Calb1    | NCBI<br>NM_009788.4                                                                                                                                     | CCTAAAGAAGGCTGGATTGGAG    | 21               | 54 | 52  | 425                   |
|           |          | AMBA<br><a href="http://mouse.brain-map.org/brain/Calb1.html?ispopup=1">http://mouse.brain-map.org/brain/Calb1.html?ispopup=1</a>                       | CCACACATTTTGATCCCTG       | 21               | 52 | 48  | 294                   |
|           |          | Gensat<br><a href="http://www.gensat.org/GeneProgressTracker.jsp?gensatGeneID=1">http://www.gensat.org/GeneProgressTracker.jsp?gensatGeneID=1</a>       | ATGGACAGAGAGATGATGAAAAA   | 24               | 52 | 38  |                       |
| <b>2</b>  | Calb2    | NCBI<br>NM_007586.1                                                                                                                                     | TTCAGCTGACGGGAATGGGTA     | 22               | 53 | 45  | 264                   |
|           |          | AMBA<br><a href="http://mouse.brain-map.org/brain/Calb2.html?ispopup=1">http://mouse.brain-map.org/brain/Calb2.html?ispopup=1</a>                       | CAAGCCTCCATAAACCACGGC     | 21               | 54 | 52  | 150                   |
|           |          | Gensat<br><a href="http://www.gensat.org/GeneProgressTracker.jsp?gensatGeneID=25">http://www.gensat.org/GeneProgressTracker.jsp?gensatGeneID=25</a>     | GCTGGAGAAGCAAGGAAGG       | 20               | 56 | 60  |                       |
| <b>3</b>  | Cck      | NCBI<br>NM_031161.2                                                                                                                                     | ATGAAGAGCGGCGTATGTCT      | 20               | 52 | 50  | 295                   |
|           |          | AMBA<br><a href="http://mouse.brain-map.org/brain/Cck.html?ispopup=1">http://mouse.brain-map.org/brain/Cck.html?ispopup=1</a>                           | CCATGTAGTCCCGGTCACT       | 24               | 54 | 55  | 184                   |
|           |          | Gensat<br><a href="http://www.gensat.org/GeneProgressTracker.jsp?gensatGeneID=356">http://www.gensat.org/GeneProgressTracker.jsp?gensatGeneID=356</a>   | GTGGTGTGGCAGTCCTAGC       | 21               | 56 | 60  |                       |
| <b>4</b>  | Gad2     | NCBI<br>NM_008078.2                                                                                                                                     | GGACCTGCTGGATGTATCG       | 21               | 53 | 58  | 501                   |
|           |          | AMBA<br><a href="http://mouse.brain-map.org/brain/Gad2.html?ispopup=1">http://mouse.brain-map.org/brain/Gad2.html?ispopup=1</a>                         | GGGATGTCAACTACGCGTTT      | 18               | 52 | 50  |                       |
|           |          | Gensat<br><a href="http://www.gensat.org/GeneProgressTracker.jsp?gensatGeneID=61">http://www.gensat.org/GeneProgressTracker.jsp?gensatGeneID=61</a>     | GATGGCATACTGTGGAG         | 20               | 52 | 50  |                       |
| <b>5</b>  | Gad1     | NCBI<br>NM_008077.4                                                                                                                                     | CGATTCACATACCCCAATG       | 20               | 50 | 45  | 588                   |
|           |          | AMBA<br><a href="http://mouse.brain-map.org/brain/Gad1.html?ispopup=1">http://mouse.brain-map.org/brain/Gad1.html?ispopup=1</a>                         | CACAAATACAGGGCGATCT       | 20               | 52 | 50  |                       |
|           |          | Gensat<br><a href="http://www.gensat.org/GeneProgressTracker.jsp?gensatGeneID=731">http://www.gensat.org/GeneProgressTracker.jsp?gensatGeneID=731</a>   | CGGGAGCGGATCCTAATACT      | 22               | 54 | 55  |                       |
| <b>6</b>  | Nos1     | NCBI<br>NM_008712.2                                                                                                                                     | TATTGGCAGTCGATGCAGC       | 22               | 52 | 50  | 372                   |
|           |          | AMBA<br><a href="http://mouse.brain-map.org/brain/Nos1.html?ispopup=1">http://mouse.brain-map.org/brain/Nos1.html?ispopup=1</a>                         | AGGCAGTCCTCCAAGAACCT      | 24               | 54 | 55  |                       |
|           |          | Gensat<br><a href="http://www.gensat.org/GeneProgressTracker.jsp?gensatGeneID=521">http://www.gensat.org/GeneProgressTracker.jsp?gensatGeneID=521</a>   | AAATCGAGGGTGCACCTGTG      | 22               | 52 | 50  |                       |
| <b>7</b>  | Npy      | NCBI<br>NM_023456.2                                                                                                                                     | CCTGGGCTCAAATGGTATG       | 20               | 54 | 55  | 293                   |
|           |          | AMBA<br><a href="http://mouse.brain-map.org/brain/Npy.html?ispopup=1">http://mouse.brain-map.org/brain/Npy.html?ispopup=1</a>                           | CACAATCCACACCAGTCGG       | 20               | 56 | 60  |                       |
|           |          | Gensat<br><a href="http://www.gensat.org/GeneProgressTracker.jsp?gensatGeneID=5">http://www.gensat.org/GeneProgressTracker.jsp?gensatGeneID=5</a>       | CCTGTCCCTTGTGGTGGTA       | 22               | 57 | 55  |                       |
| <b>8</b>  | Pvalb    | NCBI<br>NM_013645.3                                                                                                                                     | GATGAAGACTCGGTGCCAGA      | 21               | 56 | 57  | 238                   |
|           |          | AMBA<br><a href="http://mouse.brain-map.org/brain/Pvalb.html?ispopup=1">http://mouse.brain-map.org/brain/Pvalb.html?ispopup=1</a>                       | CGAATGGGCTGTGTGGA         | 18               | 53 | 61  |                       |
|           |          | Gensat<br><a href="http://www.gensat.org/GeneProgressTracker.jsp?gensatGeneID=138">http://www.gensat.org/GeneProgressTracker.jsp?gensatGeneID=138</a>   | AAGTTCATTTCCCATCACCAT     | 24               | 52 | 38  |                       |
| <b>9</b>  | Sst      | NCBI<br>NM_009215.1                                                                                                                                     | CCCTCGCTATCTCTGCTCGT      | 22               | 59 | 59  | 220                   |
|           |          | AMBA<br><a href="http://mouse.brain-map.org/brain/Sst.html?ispopup=1">http://mouse.brain-map.org/brain/Sst.html?ispopup=1</a>                           | GCGTCTCTGTGCTTTCCCTCA     | 22               | 53 | 45  |                       |
|           |          | Gensat<br><a href="http://www.gensat.org/GeneProgressTracker.jsp?gensatGeneID=146">http://www.gensat.org/GeneProgressTracker.jsp?gensatGeneID=146</a>   | GTCCGATGACAGACGTGCTCA     | 20               | 54 | 55  |                       |
| <b>10</b> | Vip      | NCBI<br>NM_011702.2                                                                                                                                     | AGCAGACAAGTCTCTGGCATC     | 20               | 54 | 52  | 195                   |
|           |          | AMBA<br><a href="http://mouse.brain-map.org/brain/Vip.html?ispopup=1">http://mouse.brain-map.org/brain/Vip.html?ispopup=1</a>                           | GAAGCGCATAGGAGCCTTTG      | 21               | 54 | 55  |                       |
|           |          | Gensat<br><a href="http://www.gensat.org/GeneProgressTracker.jsp?gensatGeneID=558">http://www.gensat.org/GeneProgressTracker.jsp?gensatGeneID=558</a>   | TGAGGAGAAGCCCTTCAGAAT     | 20               | 52 | 48  |                       |
| <b>11</b> | Adamts15 | NCBI<br>NM_001024139.1                                                                                                                                  | ATGCTGTCTGCCGTCTCCA       | 20               | 56 | 60  | 249                   |
|           |          | AMBA<br><a href="http://mouse.brain-map.org/brain/Adamts15.html?ispopup=1">http://mouse.brain-map.org/brain/Adamts15.html?ispopup=1</a>                 | GCCTCATCTCTGCTGCTCA       | 20               | 56 | 60  |                       |
|           |          | Gensat<br><a href="http://www.gensat.org/GeneProgressTracker.jsp?gensatGeneID=146">http://www.gensat.org/GeneProgressTracker.jsp?gensatGeneID=146</a>   | GCATCTCTGCTTTGGG          | 19               | 55 | 63  |                       |
| <b>12</b> | Adamts8  | NCBI<br>NM_013906.2                                                                                                                                     | GGGCTCCAGGGCATCATCT       | 20               | 56 | 60  | 418                   |
|           |          | AMBA<br><a href="http://mouse.brain-map.org/brain/Adamts8.html?ispopup=1">http://mouse.brain-map.org/brain/Adamts8.html?ispopup=1</a>                   | GGAAGCGCAAGCAAGCCCTC      | 20               | 56 | 60  |                       |
|           |          | Gensat<br><a href="http://www.gensat.org/GeneProgressTracker.jsp?gensatGeneID=558">http://www.gensat.org/GeneProgressTracker.jsp?gensatGeneID=558</a>   | GCTTTCTGAGCGGGGTGTAG      | 20               | 56 | 60  |                       |
| <b>13</b> | Akr1c18  | NCBI<br>NM_134066.2                                                                                                                                     | TGGATCAGAGGATGCCGTTT      | 20               | 52 | 50  | 275                   |
|           |          | AMBA<br><a href="http://mouse.brain-map.org/brain/Akr1c18.html?ispopup=1">http://mouse.brain-map.org/brain/Akr1c18.html?ispopup=1</a>                   | CGGCATCAGAGTGTGCTTTG      | 20               | 54 | 55  |                       |
|           |          | Gensat<br><a href="http://www.gensat.org/GeneProgressTracker.jsp?gensatGeneID=2199">http://www.gensat.org/GeneProgressTracker.jsp?gensatGeneID=2199</a> | GTGGTGTGTGGTGGAGAC        | 20               | 60 | 50  |                       |
| <b>14</b> | Btdb11   | NCBI<br>NM_028709.2                                                                                                                                     | ACTTGTCTCCAGGTTCT         | 20               | 60 | 55  | 411                   |
|           |          | AMBA<br><a href="http://mouse.brain-map.org/brain/Btdb11.html?ispopup=1">http://mouse.brain-map.org/brain/Btdb11.html?ispopup=1</a>                     | AGCCTATGCAGGCTACAAT       | 20               | 60 | 50  |                       |
|           |          | Gensat<br><a href="http://www.gensat.org/GeneProgressTracker.jsp?gensatGeneID=558">http://www.gensat.org/GeneProgressTracker.jsp?gensatGeneID=558</a>   | AGCGTAGCACACTGCCTTTT      | 20               | 60 | 50  |                       |
| <b>15</b> | Cox6a2   | NCBI<br>NM_009943.2                                                                                                                                     | AACGAAAGAGCAGGAAGCA       | 20               | 60 | 50  | 500                   |
|           |          | AMBA<br><a href="http://mouse.brain-map.org/brain/Cox6a2.html?ispopup=1">http://mouse.brain-map.org/brain/Cox6a2.html?ispopup=1</a>                     | CTCTGTGGGGTACACAGAT       | 20               | 60 | 55  |                       |
|           |          | Gensat<br><a href="http://www.gensat.org/GeneProgressTracker.jsp?gensatGeneID=84">http://www.gensat.org/GeneProgressTracker.jsp?gensatGeneID=84</a>     | GACAGAAAGACTCCCGCAAAG     | 20               | 60 | 55  |                       |
| <b>16</b> | Htr3     | NCBI<br>NM_013561.2                                                                                                                                     | TTTCACCACCACAAGTTGA       | 20               | 60 | 45  | 226                   |
|           |          | AMBA<br><a href="http://mouse.brain-map.org/brain/Htr3a.html?ispopup=1">http://mouse.brain-map.org/brain/Htr3a.html?ispopup=1</a>                       | CCTTTGGCACCCTATGCAACTGAAG | 23               | 55 | 48  |                       |
|           |          | Gensat<br><a href="http://www.gensat.org/GeneProgressTracker.jsp?gensatGeneID=2051">http://www.gensat.org/GeneProgressTracker.jsp?gensatGeneID=2051</a> | CTTTTAGCACAAGGCTCATTC     | 21               | 49 | 38  |                       |
| <b>17</b> | Kit      | NCBI<br>NM_001122733.1                                                                                                                                  | TCAAGAAAAAGTCTTGGAGTCCACC | 26               | 56 | 42  | 229                   |
|           |          | AMBA<br><a href="http://mouse.brain-map.org/brain/Kit.html?ispopup=1">http://mouse.brain-map.org/brain/Kit.html?ispopup=1</a>                           | GGAAATTTTCCAAGCTGGGTCTG   | 23               | 57 | 52  |                       |
|           |          | Gensat<br><a href="http://www.gensat.org/GeneProgressTracker.jsp?gensatGeneID=1413">http://www.gensat.org/GeneProgressTracker.jsp?gensatGeneID=1413</a> | CTGCCCTGTATTTGAGAT        | 20               | 60 | 50  |                       |
| <b>18</b> | Mme      | NCBI<br>NM_008604.3                                                                                                                                     | GAGAGCTCTGCACCCCAAG       | 20               | 60 | 60  | 533                   |
|           |          | AMBA<br><a href="http://mouse.brain-map.org/brain/Mme.html?ispopup=1">http://mouse.brain-map.org/brain/Mme.html?ispopup=1</a>                           | ACGGAGATCAAGAGGAAGCA      | 20               | 60 | 50  |                       |
|           |          | Gensat<br><a href="http://www.gensat.org/GeneProgressTracker.jsp?gensatGeneID=1413">http://www.gensat.org/GeneProgressTracker.jsp?gensatGeneID=1413</a> | GACTCTGGGCCACCGTAGTA      | 20               | 60 | 60  |                       |
| <b>19</b> | Mybp1    | NCBI<br>NM_175418.3                                                                                                                                     | TAAAGTCTGAGCCGGAGC        | 20               | 58 | 60  | 235                   |
|           |          | AMBA<br><a href="http://mouse.brain-map.org/brain/Mybp1.html?ispopup=1">http://mouse.brain-map.org/brain/Mybp1.html?ispopup=1</a>                       | GCGAAAAGCGTGTGGTTGC       | 20               | 58 | 55  |                       |
|           |          | Gensat<br><a href="http://www.gensat.org/GeneProgressTracker.jsp?gensatGeneID=286">http://www.gensat.org/GeneProgressTracker.jsp?gensatGeneID=286</a>   | CGCAGCCAAAGGAGACCATG      | 20               | 60 | 60  |                       |
| <b>20</b> | Nacc2    | NCBI<br>NM_026495.3                                                                                                                                     | TGCGGAGGTGGTATACGGG       | 20               | 62 | 65  | 157                   |
|           |          | AMBA<br><a href="http://mouse.brain-map.org/brain/Nacc2.html?ispopup=1">http://mouse.brain-map.org/brain/Nacc2.html?ispopup=1</a>                       | TCAGACACTGCAGCAAC         | 20               | 61 | 55  |                       |
|           |          | Gensat<br><a href="http://www.gensat.org/GeneProgressTracker.jsp?gensatGeneID=286">http://www.gensat.org/GeneProgressTracker.jsp?gensatGeneID=286</a>   | TATCCCACCCGACCCAG         | 18               | 59 | 67  |                       |
| <b>21</b> | Nr2f2    | NCBI<br>NM_009697.3                                                                                                                                     | GACCATCTCATGTGCGGC        | 20               | 57 | 55  | 337                   |
|           |          | AMBA<br><a href="http://mouse.brain-map.org/brain/Nr2f2.html?ispopup=1">http://mouse.brain-map.org/brain/Nr2f2.html?ispopup=1</a>                       | GAAGTGGCGGATGGAGGA        | 18               | 55 | 61  |                       |
|           |          | Gensat<br><a href="http://www.gensat.org/GeneProgressTracker.jsp?gensatGeneID=286">http://www.gensat.org/GeneProgressTracker.jsp?gensatGeneID=286</a>   | TCTGCTCTCCGCTCTGTGG       | 20               | 56 | 60  |                       |
| <b>22</b> | Nxph1    | NCBI<br>NM_001122733.1                                                                                                                                  | CAGCACAGGGGACACAGAGC      | 20               | 58 | 65  | 538                   |
|           |          | AMBA<br><a href="http://mouse.brain-map.org/brain/Nxph1.html?ispopup=1">http://mouse.brain-map.org/brain/Nxph1.html?ispopup=1</a>                       | GTCTCCGCCATCCATCCATC      | 20               | 56 | 60  |                       |
|           |          | Gensat<br><a href="http://www.gensat.org/GeneProgressTracker.jsp?gensatGeneID=1413">http://www.gensat.org/GeneProgressTracker.jsp?gensatGeneID=1413</a> | CGTCGCTGTCTTCTTGGCCA      | 20               | 54 | 50  |                       |
| <b>23</b> | Pnoc     | NCBI<br>NM_008604.3                                                                                                                                     | GCCTCAGCGAAACTACAAG       | 20               | 60 | 55  | 569                   |
|           |          | AMBA<br><a href="http://mouse.brain-map.org/brain/Pnoc.html?ispopup=1">http://mouse.brain-map.org/brain/Pnoc.html?ispopup=1</a>                         | GTGGATGTCTGAGACTGA        | 20               | 60 | 50  |                       |
|           |          | Gensat<br><a href="http://www.gensat.org/GeneProgressTracker.jsp?gensatGeneID=1413">http://www.gensat.org/GeneProgressTracker.jsp?gensatGeneID=1413</a> | TGGATGGATGCTGAGACAAA      | 20               | 60 | 45  |                       |
| <b>24</b> | Rein     | NCBI<br>NM_175418.3                                                                                                                                     | TCGGCCTGAGGAATAAATG       | 20               | 60 | 45  | 273                   |
|           |          | AMBA<br><a href="http://mouse.brain-map.org/brain/Rein.html?ispopup=1">http://mouse.brain-map.org/brain/Rein.html?ispopup=1</a>                         | CCCTGTTCAAGGAGGTGAGCGTC   | 23               | 62 | 65  |                       |
|           |          | Gensat<br><a href="http://www.gensat.org/GeneProgressTracker.jsp?gensatGeneID=286">http://www.gensat.org/GeneProgressTracker.jsp?gensatGeneID=286</a>   | CACGTCATGACCAAGTGTGCTG    | 22               | 57 | 55  |                       |
| <b>25</b> | Sema3c   | NCBI<br>NM_175418.3                                                                                                                                     | ACAAGTTAGTCTATGACCAATGCTC | 24               | 54 | 42  | 227                   |
|           |          | AMBA<br><a href="http://mouse.brain-map.org/brain/Sema3c.html?ispopup=1">http://mouse.brain-map.org/brain/Sema3c.html?ispopup=1</a>                     | CTCGGCTCCAGATGGCTTTGG     | 21               | 58 | 62  |                       |
|           |          | Gensat<br><a href="http://www.gensat.org/GeneProgressTracker.jsp?gensatGeneID=286">http://www.gensat.org/GeneProgressTracker.jsp?gensatGeneID=286</a>   | CTCGAGATGGTGTGGCAGTA      | 20               | 60 | 55  |                       |
| <b>26</b> | Sema4g   | NCBI<br>NM_026495.3                                                                                                                                     | AGCAGACCTTGTGCTCAC        | 20               | 60 | 55  | 584                   |
|           |          | AMBA<br><a href="http://mouse.brain-map.org/brain/Sema4g.html?ispopup=1">http://mouse.brain-map.org/brain/Sema4g.html?ispopup=1</a>                     | ATGGTGGAGGAGCAGTATGG      | 20               | 60 | 55  |                       |
|           |          | Gensat<br><a href="http://www.gensat.org/GeneProgressTracker.jsp?gensatGeneID=2051">http://www.gensat.org/GeneProgressTracker.jsp?gensatGeneID=2051</a> | TCTCCAGGATCTCCCTCTGA      | 20               | 60 | 55  |                       |
| <b>27</b> | Slc17a7  | NCBI<br>NM_026495.3                                                                                                                                     | ATGGTGGAGGAGCAGTATGG      | 20               | 60 | 55  | 199                   |
|           |          | AMBA<br><a href="http://mouse.brain-map.org/brain/Slc17a7.html?ispopup=1">http://mouse.brain-map.org/brain/Slc17a7.html?ispopup=1</a>                   | CTCCAGGCTTTCAGCAGC        | 20               | 56 | 60  |                       |
|           |          | Gensat<br><a href="http://www.gensat.org/GeneProgressTracker.jsp?gensatGeneID=78">http://www.gensat.org/GeneProgressTracker.jsp?gensatGeneID=78</a>     | GCTGCTTCTGCTCCACCTCC      | 20               | 58 | 65  |                       |
| <b>28</b> | Sema4c   | NCBI<br>NM_012261.2                                                                                                                                     | CCCGCCTCTCTGGACTGTA       | 20               | 58 | 65  | 236                   |
|           |          | AMBA<br><a href="http://mouse.brain-map.org/brain/Sema4c.html?ispopup=1">http://mouse.brain-map.org/brain/Sema4c.html?ispopup=1</a>                     | CCACCTCCTCAGCGTCATCT      | 20               | 56 | 60  |                       |
|           |          | Gensat<br><a href="http://www.gensat.org/GeneProgressTracker.jsp?gensatGeneID=78">http://www.gensat.org/GeneProgressTracker.jsp?gensatGeneID=78</a>     | CGCCAAGAACAATACCGCTG      | 20               | 54 | 55  |                       |
| <b>29</b> | Sema4d   | NCBI<br>NM_012261.2                                                                                                                                     | GTCTGATTTACGGTCCACA       | 22               | 55 | 50  | 487                   |
|           |          | AMBA<br><a href="http://mouse.brain-map.org/brain/Sema4d.html?ispopup=1">http://mouse.brain-map.org/brain/Sema4d.html?ispopup=1</a>                     | GAGCCCTTCCAATGTGAGC       | 20               | 56 | 60  |                       |
|           |          | Gensat<br><a href="http://www.gensat.org/GeneProgressTracker.jsp?gensatGeneID=60">http://www.gensat.org/GeneProgressTracker.jsp?gensatGeneID=60</a>     | CCTGTGGCTGGCTCTCAA        | 20               | 56 | 60  |                       |
| <b>30</b> | Sema4e   | NCBI<br>NM_013657.5                                                                                                                                     | GGGCGATTTGTGTGGT          | 20               | 52 | 50  | 396                   |
|           |          | AMBA<br><a href="http://mouse.brain-map.org/brain/Sema4e.html?ispopup=1">http://mouse.brain-map.org/brain/Sema4e.html?ispopup=1</a>                     | TGAAACGCTCCTCCACAG        | 20               | 56 | 60  |                       |
|           |          | Gensat<br><a href="http://www.gensat.org/GeneProgressTracker.jsp?gensatGeneID=117">http://www.gensat.org/GeneProgressTracker.jsp?gensatGeneID=117</a>   | CCAGCCCCAAGCAAGAGTTT      | 20               | 54 | 55  |                       |
| <b>31</b> | Sema4f   | NCBI<br>NM_011976.1                                                                                                                                     | ATCTTTGCCAGCCATTTTCG      | 20               | 50 | 45  | 252                   |
|           |          | AMBA<br><a href="http://mouse.brain-map.org/brain/Sema4f.html?ispopup=1">http://mouse.brain-map.org/brain/Sema4f.html?ispopup=1</a>                     | GTTCGAGGAGGAAAGGAG        | 20               | 60 | 55  |                       |
|           |          | Gensat<br><a href="http://www.gensat.org/GeneProgressTracker.jsp?gensatGeneID=117">http://www.gensat.org/GeneProgressTracker.jsp?gensatGeneID=117</a>   | TCCATAAAGGGCCTGTGAA       | 20               | 60 | 45  |                       |
| <b>32</b> | Slc17a7  | NCBI<br>NM_182993.2                                                                                                                                     | TATGATTCGGAGCATCC         | 20               | 60 | 45  | 400                   |
|           |          | AMBA<br><a href="http://mouse.brain-map.org/brain/Slc17a7.html?ispopup=1">http://mouse.brain-map.org/brain/Slc17a7.html?ispopup=1</a>                   | CGGCATGAAATGTGTGG         | 20               | 60 | 50  |                       |
|           |          | Gensat<br><a href="http://www.gensat.org/GeneProgressTracker.jsp?gensatGeneID=117">http://www.gensat.org/GeneProgressTracker.jsp?gensatGeneID=117</a>   | CCCTTAGAACGGAGTGGCT       | 20               | 56 | 60  |                       |
| <b>33</b> | Slc17a7  | NCBI<br>NM_182993.2                                                                                                                                     | TATCCGACCCAGCAGCAG        | 20               | 56 | 60  | 592                   |
|           |          | AMBA<br><a href="http://mouse.brain-map.org/brain/Slc17a7.html?ispopup=1">http://mouse.brain-map.org/brain/Slc17a7.html?ispopup=1</a>                   | ACGACAGCCCTTTGCGGTTG      | 20               | 54 | 55  |                       |
|           |          | Gensat<br><a href="http://www.gensat.org/GeneProgressTracker.jsp?gensatGeneID=117">http://www.gensat.org/GeneProgressTracker.jsp?gensatGeneID=117</a>   | CAAAGTAGCGGGCTGAGAG       | 20               | 56 | 60  |                       |
